# Supplementary material
Source: PubMed Central journal article supplement (PMC3346086)

## Legends for Supplementary Figures

### **Figure S1. Identification of transcription factor binding motifs on the IL-9 promoter.**

(A) Comparative bioinformatic analysis was performed by using rVista (2.0) program that depicts % conservation between mouse (as a base) and human IL-9 loci. Boxed region indicates the IL-9 promoter. (B) The prediction of transcription factor binding sites was performed using TRANSFAC database analysis at a matrix similarity of 0.8.

### **Figure S2. Analysis of IL-9 expression in T helper cells.**

CD4<sup>+</sup> T cells were cultured under Th1, Th2 and Th9 skewing conditions. Relative levels of subtype specific signature cytokines (IFN- $\gamma$  in Th1, IL-4 in Th2 and IL-9 in Th9, respectively) were analyzed by qRT-PCR under no stimulation or PMA/ionomycin stimulation by normalizing to the expression level of housekeeping gene HPRT (A-C). The levels of secreted cytokines in the culture supernatant were analyzed by ELISA (D-F). The data shown are expressed as mean  $\pm$  SEM, n = 3 and \*P<0.05, \*\* P<0.01, \*\*\*P<0.001.

### **Figure S3. Expression kinetics of IL-9 in Th9 cells.**

(A-B) Relative level of IL-9 was analyzed by qRT-PCR during *in vitro* Th9 cell differentiation (A) or at day 5 (B) after stimulation with PMA/ionomycin for the indicated time periods by normalizing to the expression level of housekeeping gene HPRT.

### **Figure S4. NFAT1 deficiency reduces IL-9 expression in CD4<sup>+</sup> T cell blasts.**

CD4<sup>+</sup> T cells isolated from wild type (WT) and NFAT1<sup>-/-</sup> mice were restimulated with PMA/ionomycin for the indicated time periods and relative levels of IL-9 transcript were measured by qRT-PCR (A) and ELISA (B). The data shown are expressed as mean  $\pm$  SEM, n = 3 and \*P<0.05, \*\* P<0.01.

### **Figure S5. Effect of IFN- $\gamma$ signaling on IL-9 expression.**

CD4<sup>+</sup> T cells from wild type (WT) and NFAT1<sup>-/-</sup> (KO) were differentiated under IL-4 and TGF- $\beta$  cytokine milieu in the presence or absence of  $\alpha$ -IFN- $\gamma$ . On day 5, cells were restimulated with PMA/ionomycin (PI) for 24 hrs and the levels of the secreted cytokines (IL-9 and IFN- $\gamma$ ) in the cell culture supernatants were analyzed using ELISA. The data shown are expressed as mean  $\pm$  SEM, n = 3 and \*P<0.05, \*\* P<0.01, \*\*\*P<0.001.

### **Figure S6. IL-9 promoter activity in wild type (WT) and NFAT1<sup>-/-</sup> (KO) cells.**

Th9 cells differentiated from Wild type (WT) and NFAT1<sup>-/-</sup> (KO) mice were transfected with the empty vector (Mock), IL-9 promoter reporter construct or mutated IL-9 promoter reporter construct that has mutation in both NF- $\kappa$ B binding sites (mt-IL-9 Pro; NT/ $\kappa$ B1 and NT/ $\kappa$ B2). After 18 hrs of transfection, cells were stimulated with PMA/Ionomycin for additional 8 hrs and luciferase assay was performed. The luciferase activity was calculated relative to the activity of Renilla luciferase and represented as Relative Luciferase Unit (RLU) as a fold difference relative to the control (Mock/empty plasmid) value. The data is representative of at least 3 independent experiments. Inset shows relative levels of NFAT1, p65 and Lamin B protein in the Wild Type (WT) and NFAT1<sup>-/-</sup> (KO) cells.

Supplementary Figure 1

A

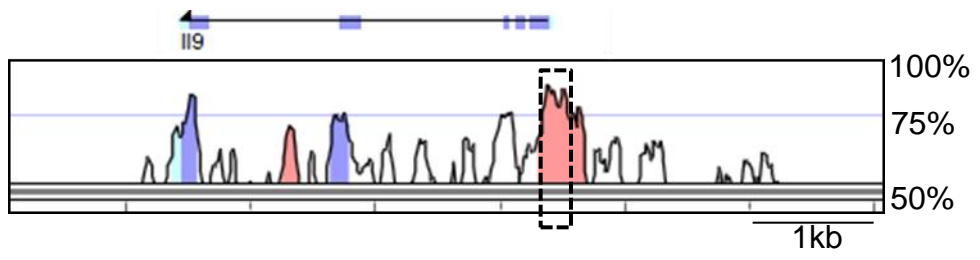

B

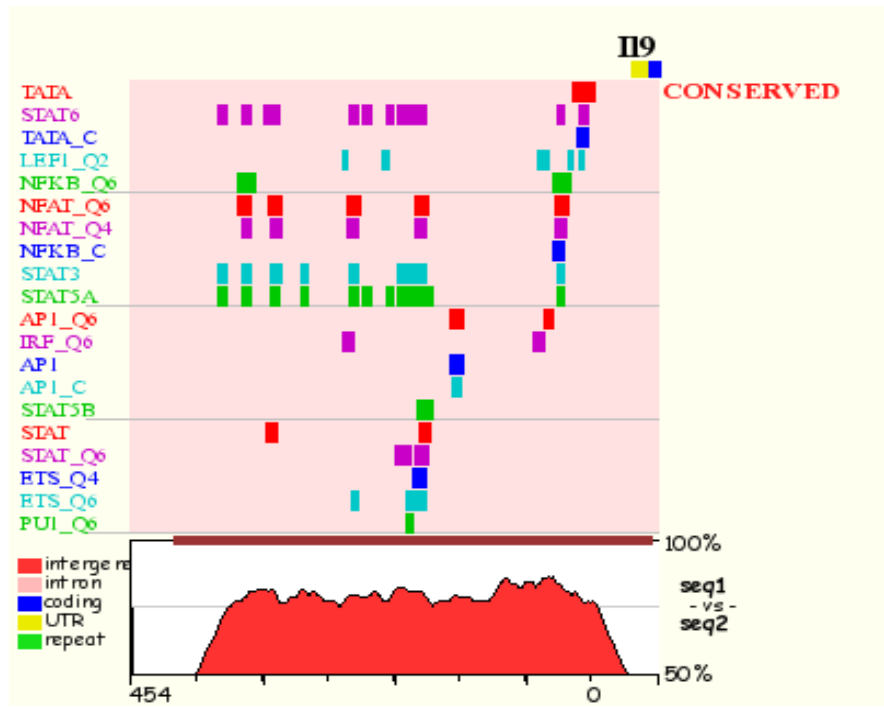

Supplementary Figure 2

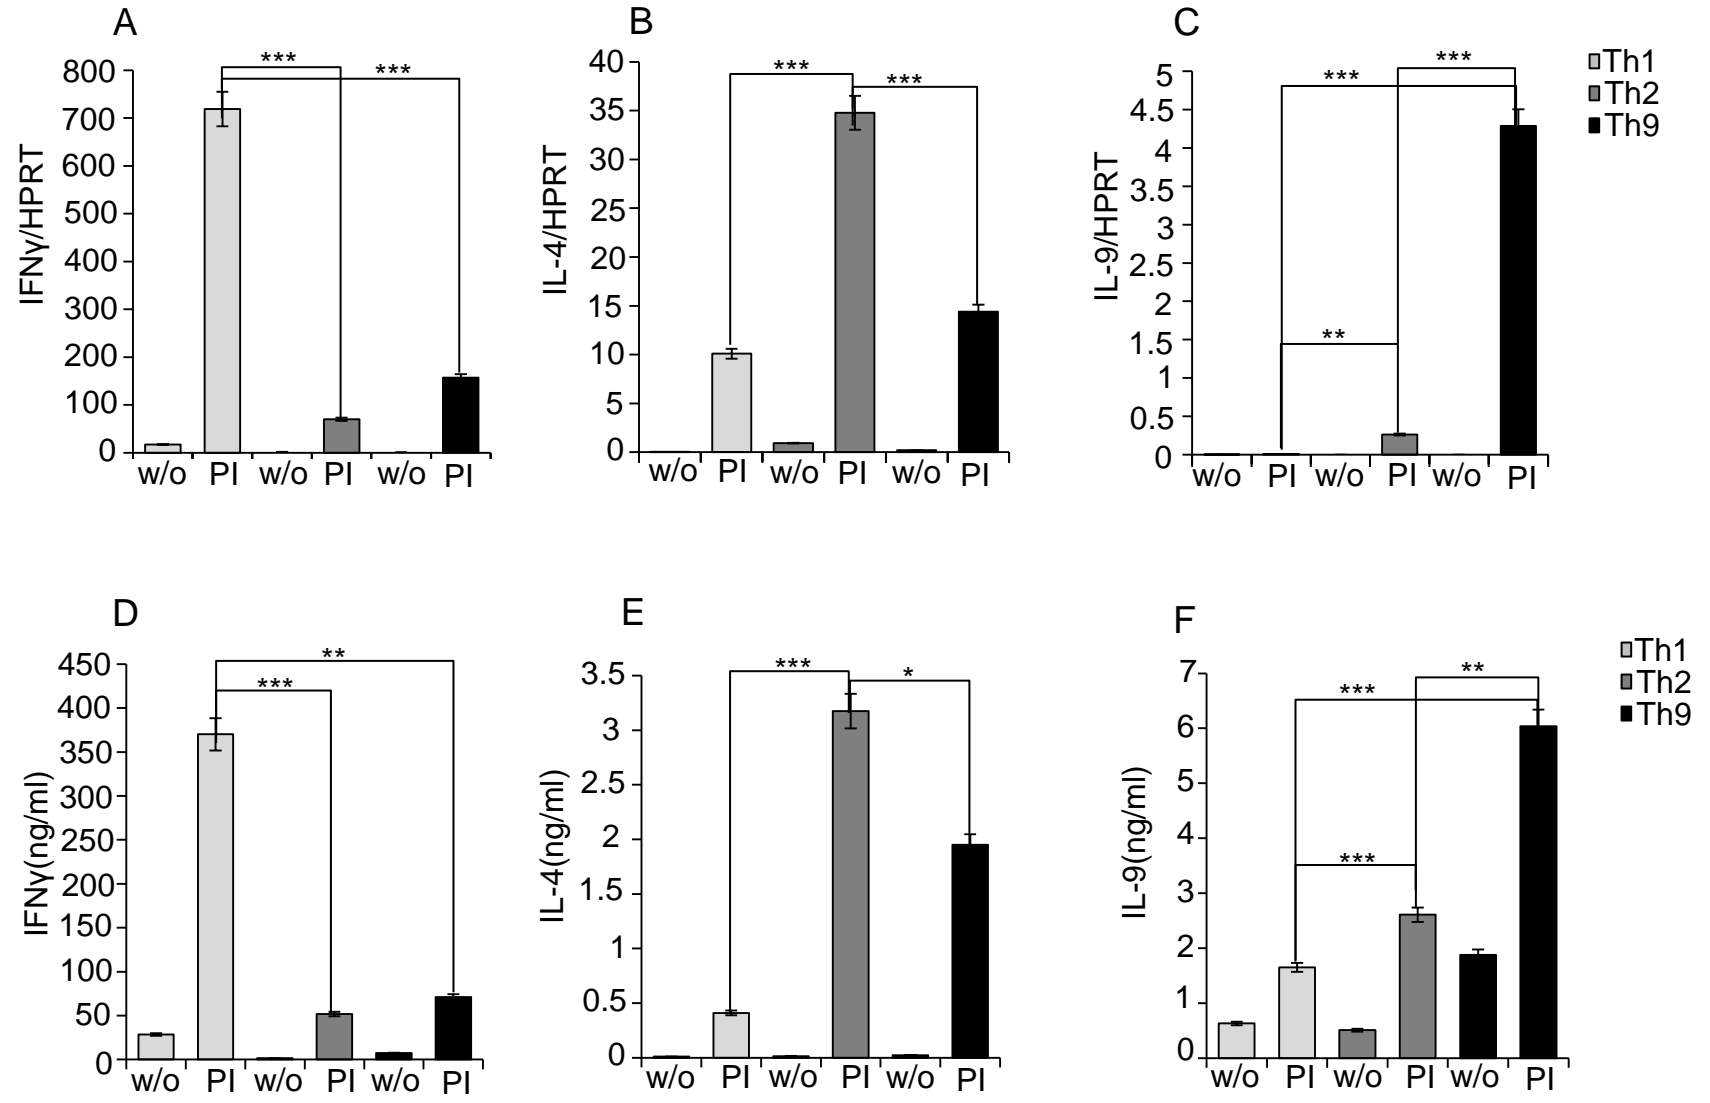

A

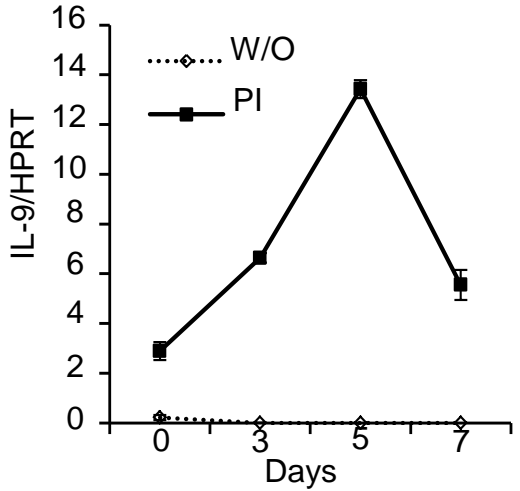

B

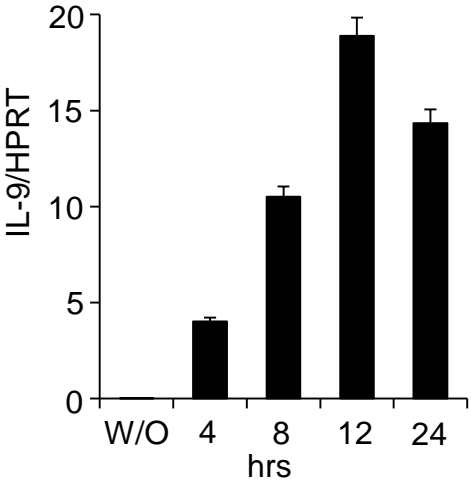

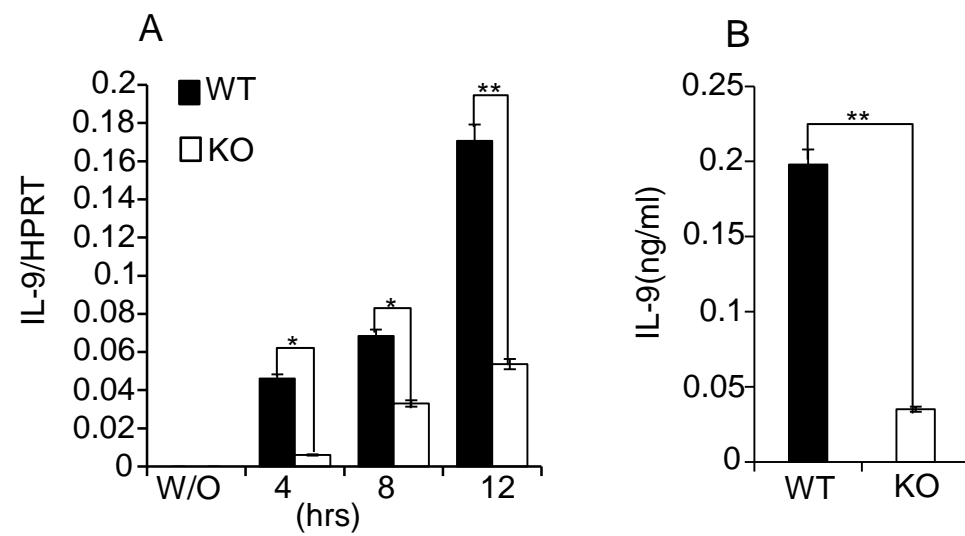

Supplementary Figure 5

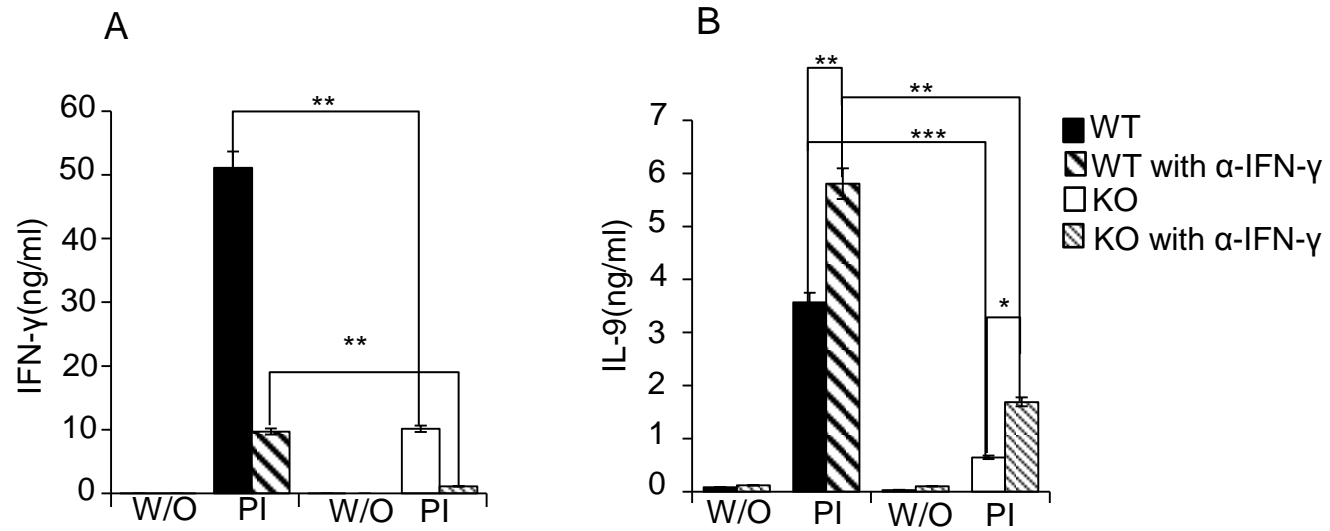

Supplementary Figure 6

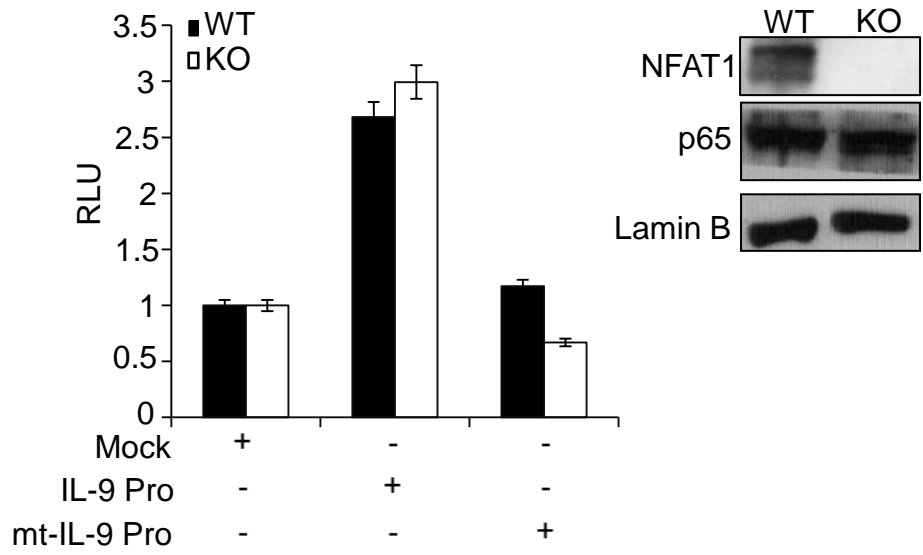

Supplement: supp_M112.340356_jbc.M112.340356-1.pdf [file supp_M112.340356_jbc.M112.340356-1.pdf]
